1 **Title:** Brain Vasculature Accumulates Tau and Is Spatially Related to Tau Tangle  
2 Pathology in Alzheimer's Disease

3 **Short Running Title:** Brain Vasculature Accumulates Tau

4

5 **Authors:** Zachary Hoglund<sup>1</sup>, Nancy Ruiz-Urbe<sup>1,2</sup>, Eric del Sastre<sup>1</sup>, Benjamin Woost<sup>1</sup>,  
6 Joshua Bailey<sup>1</sup>, Bradley T. Hyman<sup>1,2</sup>, Theodore Zwang<sup>1,2,†,\*</sup>, Rachel E. Bennett<sup>1,2,†,\*</sup>

7

8

9 **Affiliations:**

10 <sup>1</sup> Department of Neurology, Massachusetts General Hospital, Charlestown, MA, USA

11 <sup>2</sup> Harvard Medical School, Boston, MA, USA

12 <sup>†</sup>These authors contributed equally to this work.

13

14 \* Address correspondence to these authors at the Department of Neurology,  
15 Massachusetts General Hospital, 114 16th Street, Charlestown, Massachusetts, USA;  
16 Tel: 617-726-1263; E-mails: [rebennett@mgh.harvard.edu](mailto:rebennett@mgh.harvard.edu), [tzwang@mgh.harvard.edu](mailto:tzwang@mgh.harvard.edu)

17

18

19

20

21

22

23

24

25 **Abstract**

26 Insoluble pathogenic proteins accumulate along blood vessels in conditions of cerebral  
27 amyloid angiopathy (CAA), exerting a toxic effect on vascular cells and impacting cerebral  
28 homeostasis. In this work we provide new evidence from three-dimensional human brain  
29 histology that tau protein, the main component of neurofibrillary tangles, can similarly  
30 accumulate along brain vascular segments. We quantitatively assessed n=6 Alzheimer's  
31 disease (AD), and n=6 normal aging control brains and saw that tau-positive blood vessel  
32 segments were present in all AD cases. Tau-positive vessels are enriched for tau at levels  
33 higher than the surrounding tissue and appear to affect arterioles across cortical layers  
34 (I-V). Further, vessels isolated from these AD tissues were enriched for N-terminal tau  
35 and tau phosphorylated at T181 and T217. Importantly, tau-positive vessels are  
36 associated with local areas of increased tau neurofibrillary tangles. This suggests that  
37 accumulation of tau around blood vessels may reflect a local clearance failure. In sum,  
38 these data indicate tau, like amyloid beta, accumulates along blood vessels and may  
39 exert a significant influence on vasculature in the setting of AD.

40

41 **Keywords**

42 Alzheimer's disease, tau, neurofibrillary tangles, blood vessels, cerebral vasculature,  
43 cerebral amyloid angiopathy

44

45

46

47

48

49

50

51

## 52 Introduction

53 The formation of tau-containing neurofibrillary tangles (NFTs) is closely associated with  
54 the severity and progression of Alzheimer's disease (AD)<sup>1, 2</sup>. Because of this close  
55 relationship, it is important to investigate the mechanisms by which these pathological  
56 aggregates of tau protein form, and why certain neurons are more vulnerable to tangle  
57 formation than others. On the molecular scale, NFTs form when tau protein is post-  
58 translationally modified, notably by phosphorylation at multiple sites in the protein's  
59 structure, increasing its propensity to self-aggregate. In AD, aggregates develop in  
60 distinct regional patterns, including with varying density between cortical layers<sup>3, 4</sup>. These  
61 observations indicate that neuroarchitecture plays a significant role in the progression of  
62 tau pathology. In addition to intracellular accumulation in neurons, tau is also secreted  
63 into the extracellular space and can be detected in cerebrospinal fluid and blood.

64 Given that that tau is present extracellularly, we hypothesized that one key mechanism  
65 that may influence the local accumulation of tau pathology could be vascular brain  
66 clearance pathways<sup>5</sup>. Peri- and para-vascular clearance pathways serve as important  
67 routes for the removal of brain solutes, linking the interstitial (ISF) and cerebrospinal fluid  
68 (CSF) compartments, while trans-vascular clearance may directly transport other  
69 molecules from brain to the blood. Reduced export of protein wastes along these  
70 pathways is believed to lead to the accumulation of toxic and aggregation-prone species  
71 of AD-related proteins<sup>6-9</sup>. This is most clearly exemplified by cerebral amyloid angiopathy  
72 (CAA), a common AD co-pathology in which insoluble amyloid beta accumulates in the  
73 basement membrane and smooth muscle cells of leptomeningeal and penetrating  
74 arterioles in the brain. In a recent study, Harrison *et al* showed that globally perturbing the  
75 CSF-ISF flow accelerated tau deposition in the brains of a mouse model<sup>6</sup>. This work  
76 demonstrated that this system is important not just for amyloid beta but also for tau protein  
77 clearance; however, it did not examine individual vessels to understand their direct  
78 contribution to pathology. In related work, our group observed that isolated vasculature  
79 from both tauopathy mice and human AD brains contains high levels of bioactive tau  
80 capable of seeding new aggregates<sup>10</sup>. Together, this suggests that impaired clearance  
81 of these bioactive tau species could result in vasculature becoming important reservoirs  
82 for tau protein.

83 In this study, we identified the presence of tau immunoreactivity along cerebral brain  
84 vessels in AD patients and sought to quantify the relationship between tau pathology and  
85 brain vasculature at smaller, single-cell spatial scales. We predicted that if impaired  
86 perivascular clearance is related to formation of tau tangles, increased phosphorylated  
87 tau species would be present along blood vessels in the brain and tangles would exhibit  
88 close spatial relationships with vasculature compared to non-tangle bearing neurons.  
89 However, one challenge of investigating protein distribution in the brain is imaging  
90 structures at high resolution in large tissue volumes. Advances in tissue clearing and  
91 multiplexed antibody staining have addressed this gap and enabled us to quantify the  
92 distribution of tau pathology and determine its spatial relationship to vasculature in the  
93 AD brain with single-cell resolution<sup>11, 12</sup>. This allowed us to quantify, in three dimensions,  
94 the proximity of phosphorylated tau and NFTs to individually segmented blood vessels.  
95 In addition, we conducted protein assays to determine the presence of bioactive tau  
96 species in vasculature. Surprisingly, these experiments uncovered new evidence that,  
97 like CAA, tau accumulates along vascular segments in the AD brain. Additionally, NFT  
98 density positively correlated with the amount of tau accumulated along vascular  
99 segments, indicating that tau accumulation along vasculature is associated with tangle  
100 formation in Alzheimer's disease.

101

102

103

104

105

106

107

108

109

110

111

112

## 113 **Materials and Methods**

114 *Human tissues.* Fresh frozen human tissue samples of the inferior temporal gyrus were  
115 provided by the Massachusetts Alzheimer's Disease Research Center (ADRC) with  
116 approval from the Mass General Brigham IRB (1999P009556) and with informed consent  
117 of patients or their relatives. In total, 7 human participants with Alzheimer's disease and  
118 6 controls were selected from the Massachusetts Alzheimer's Disease Research Center.  
119 Sex, age at death, Braak staging, post-mortem interval and comorbidities are listed  
120 in **Table 1**.

121

## 122 **Protocol for assaying tau extracted from blood vessel homogenates**

123 *Isolation of blood vessels.* Blood vessels were isolated from 200-300 mg of frozen mice  
124 and human tissue. Brains were minced in 2 mm sections using a razor blade in ice-cold  
125 B1 buffer (Hanks Balanced Salt Solution with 10mM HEPES, pH 7; Thermo Fischer  
126 Scientific). Then samples were manually homogenized using a Dounce homogenizer with  
127 12 strokes. Homogenate was then transferred into a conical tube filled with 20 mL of B1  
128 buffer and centrifuged at 2,000 g for 10 minutes at 4 °C. Supernatant was discarded and  
129 pellet vigorously resuspended during 1 min in 20 mL of B2 buffer (B1 buffer with 18 %  
130 dextran, Sigma-Aldrich) to remove myelin. Samples were centrifuged 4,400g for 15 min  
131 at 4 °C. The myelin layer was carefully detached, and the pellet was resuspended in 1  
132 mL of B3 buffer (B1 buffer with 1 % Bovine Serum Albumin, BSA, Sigma-Aldrich).  
133 Afterwards, homogenate was filtered through a 20 µm mesh (Millipore) previously  
134 equilibrated with 5 mL of ice-cold B3 solution. Brain blood vessels were rinsed with 15 mL  
135 of ice-cold B3 solution and then the blood vessels detached from the filters by immersing  
136 them in 20 mL of B3 ice-cold solution. Vessels were centrifuged at 2,000g for 5 min at 4  
137 °C. Finally, the pellet was resuspended in 1 mL of ice-cold B1 solution and again

138 centrifuged at 2,000g for 5 min at 4 °C and the supernatant was discarded. Vessel-  
139 containing pellets were stored at – 80 °C.

140 *Protein assays.* Protein was extracted from human and mice brain blood vessels  
141 homogenates, which were sonicated at 20 % amplitude in 10 strokes in PBS  
142 supplemented with protease and phosphatase inhibitors (cOmplete Mini and PhosSTOP  
143 EASYpack; Roche). Then, samples were centrifuged at 3,000 g for 5 min at 4 °C and  
144 supernatant discarded. Proteins were analyzed following a capillary based  
145 electrophoresis instrument (SimpleWes, Biotechne). Three mg of protein were used per  
146 sample. Protein separation and detection were performed by capillary electrophoresis,  
147 binding of antibodies and HRP conjugated secondaries were done in SimpleWes  
148 machine. Antibodies used were phospho-T181 (mouse 1:50, MN10050, Invitrogen),  
149 phospho-S202 (rabbit 1:25, 39357S, Cell Signaling), phospho-T217 (rabbit 1:25, 44-744,  
150 Invitrogen), phospho-T231 (rabbit 1:50, #44-746, Invitrogen), Tau13 (mouse 1:50,  
151 835201, Biolegend), Tau46 (mouse 1:50, 4019S, Cell Signaling) and total tau (rabbit 1:50,  
152 A0024, DAKO). Specific SimpleWes secondary antibodies HRP conjugated were  
153 acquired from the manufacturer (Biotechne). Protein quantification was analyzed in Fiji  
154 (<https://doi.org/10.1038/nmeth.2019>). The total intensity of signal in each lane was  
155 measured and normalized to the average of the three control samples.

156

### 157 **Protocol for Tissue Clearing and Imaging**

158 *Tissue slicing.* Brain samples were placed in 4% paraformaldehyde (Thermo Fisher  
159 Scientific, cat No. 50980487) for 24 hours at 4°C. Tissue was then rinsed three times with  
160 50 ml phosphate-buffered saline (PBS) for 10 minutes each, then placed in fresh PBS  
161 overnight at 4°C and rinsed with fresh PBS. Fixed tissue underwent three rinsing cycles  
162 in 10-minute increments using 50 ml of PBS, then were placed in fresh PBS overnight at  
163 4°C. In preparation for tissue slicing, tissue was transferred to individual 35 mm Petri  
164 dishes and embedded in a gel block by pouring warm 4% agarose gel solution in PBS (4  
165 g/100 ml) (Promega, cat No. V3121) over the tissue. The gel was then cooled to solidify  
166 and cut into a block to provide rigidity for cutting even slices. The tissue was secured on  
167 Vibratome (Leica Biosystems, VT1000 S Vibrating Blade Microtome) slide via super  
168 gluing the bottom of the agarose block. The vibratome was then used to slice 0.5–1 mm

169 thick sections of tissue. Each slice was then removed from the agarose through gentle  
170 manipulation with blunt forceps or paintbrushes and were then placed in crosslinking  
171 solution, described below.

172 *Delipidation.* Tissue was then placed into sodium dodecyl sulphate (Sigma-Aldrich, cat  
173 No. L3771) 28.83 g/500 ml PBS-clearing solution supplemented with sodium borate  
174 (Sigma-Aldrich, cat No. S9640) on shaker at 100 rpm and 37C for ~3 days. After  
175 delipidation, the brain slices were rinsed with 50 ml PBS five times over 24 hours.

176 *Immunohistochemistry.* Each brain slice was placed in a 2 ml Eppendorf tube that could  
177 hold the slice so its large, flat sides could be exposed to solution. PBST (PBS with 0.2%  
178 Triton X-100, Thermo Fisher Scientific) was added to just cover the top of the samples  
179 (~500  $\mu$ l). Tissue was heated to 50°C for 1 hour in PBST and then cooled to room  
180 temperature prior to incubation with antibodies. The following conjugated antibodies were  
181 then added to the solution containing each tissue slice: phospho-tau Ser202, Thr205  
182 (AT8, 1.6:500, Thermo Fisher, cat No. MN1020) conjugated to Alexa Fluor 647 (Thermo  
183 Fisher, cat No. A37573), HuD Antibody E-1 (1.6:500, Santa Cruz Biotechnology, cat No.  
184 sc-28299) conjugated to Alexa Fluor 555 (Thermo Fisher, cat No. A37571), Glut1  
185 antibody conjugated to Alexa Fluor 488 (EMD Millipore, 07-1401-AF488) and 4',6-  
186 diamidino-2-phenylindole dihydrochloride (DAPI, 1.6:500, Sigma-Aldrich, cat No.  
187 10236276001). Tissue was incubated with primary antibodies for one week at 4°C with  
188 gentle shaking. Following incubation, tissue was washed in fresh PBST 3  $\times$  10 min and  
189 set on shaker for one week at 4°C with gentle shaking.

190 *Refractive index matching.* After immunohistochemical staining, the samples were  
191 incubated with 80% glycerol, 20% deionized water for 24 hours at room temperature with  
192 gentle shaking. Samples were then placed on a glass microscope slide with a 3D-printed  
193 ring that allows the tissue to remain in a pool of glycerol during imaging. The ring was 3D-  
194 printed to match the thickness of the tissue (Formlabs) so a glass coverslip could be  
195 placed on top and seal the tissue in the glycerol.

196 *Imaging.* The tissue was imaged using Olympus Inverted Confocal FV3000 with a 10  $\times$   
197 air objective, and multi-region images were stitched together using the microscope  
198 software (Fluoview FV31S-SW, Version 2.5.1.228). Additional higher resolution images



199 were collected by placing the tissue in a bath of 80% glycerol in a Petri dish and imaged  
200 with using a 20 × immersion objective (Zeiss Clr Plan-Neofluar 20x/1.0 Corr) with an  
201 inverted Zeiss 980 confocal microscope. Image Z-stacks were then reconstructed and  
202 visualized using Imaris microscopy image analysis software.

203

## 204 **Protocol for Segmentation and Quantification of Pathology**

205 *Analysis with Ilastik (1.4.0).* Imaging data for tau and HuD were converted to HDF5 format  
206 using Ilastik's ImageJ plugin<sup>13</sup>. The staining was then individually segmented for each  
207 image using Ilastik's pixel classifier workflow. In short, a paintbrush was used to draw  
208 over the signal and background to help train the classifier on how to segment each image.  
209 All images were then processed through the trained pixel classifier, and probability maps  
210 were exported as HDF5 formatted images. Pixel probability maps and raw data were  
211 loaded into Ilastik's object classification workflow and used to train object classifiers for  
212 each image. Tau object classifiers were trained by manually classifying objects as noise  
213 or tangles, and HuD object classifiers were trained by manually classifying objects as  
214 noise or neurons. Data was exported as object identities and spreadsheets with  
215 information about the objects' classification and characteristics, which were then loaded  
216 into MATLAB (r2023b) code to match objects from each channel with colocalized objects.

217 *Separating objects into cortical layers.* Imaris surface generation was used to draw  
218 regions around each cortical layer on individual imaging planes within the Z-stack, which  
219 was then merged into distinct volumes that contain each cortical layer. These volumes  
220 were then used to generate a new channel by masking the pixels contained within each  
221 volume and setting them equal to the cortical layer (i.e. pixels in layer 1 = 1, pixels in layer  
222 2 = 2, etc.) and pixels not within a clearly defined layer equal to zero. This channel was  
223 then exported as a single multipage tiff stack, which could be loaded into our MATLAB  
224 code to identify the cortical layer for each object output by Ilastik.

225 *Blood vessel segmentation.* Individual blood vessels were manually segmented from  
226 clear brain images using a virtual reality image analysis software (Syglass). Blood vessels  
227 with diameters of approximately 20 μm were selected for segmentation, and 18-25 blood  
228 vessels were manually masked and segmented in each sample. Diameters were



229 measured by drawing a line across the center cross-section of each blood vessel and  
230 averaging three measures taken from separate locations. Individually masked blood  
231 vessels were then realigned with their original image in Imaris, and distance transforms  
232 were calculated and exported for each blood vessel.

233 *Intensity & density calculation and binning (MATLAB r2023b)*. MATLAB scripts were  
234 developed to calculate the intensity of tau staining, neuron density, and tau tangle density,  
235 along and away from the segmented blood vessels' surfaces. First, tau data, segmented  
236 blood vessel distance transform images, and segmented cortical layer images were  
237 loaded simultaneously in one MATLAB script to align all images and export coordinates  
238 for data within 100 microns of the blood vessels' surfaces. These coordinates contained  
239 data for each pixel in this range, with their X, Y, and Z positions; tau intensity; and cortical  
240 layer. To account for staining differences in each sample, tau intensity was normalized  
241 between samples using a piecewise linear normalization. The pixel intensity for  
242 background, autofluorescence, and AT8 positivity were recorded in each sample at 3  
243 depths in the images' z-stacks, with 10 measurements in each category per depth. Then,  
244 measurements were averaged for each category and linear functions between them were  
245 calculated to normalize the data on a singular dataspace.

246 To analyze tau staining intensity along the blood vessel, the exported coordinates were  
247 input into a script that calculates the pixel distance, in microns, along the surface of the  
248 blood vessel. This script calculated a centerline through the blood vessel, found the  
249 nearest position on the centerline to each tau pixel, and calculated that position's distance  
250 from the start of the centerline<sup>14</sup>. The data was then exported as the original coordinates  
251 with their distance along the vessel appended. A similar script was used for the neuron  
252 and tangle density analysis, where the object coordinates obtained from Ilastik were input  
253 along with the intensity coordinates. This script calculated the distance along the vessel  
254 for each object within 30 microns of the vessel surface.

255 Finally, these data were binned into groups based on their distance along and away from  
256 the blood vessel. Immunolabeling intensity, neuron, and NFT data were grouped in 10-  
257 micron intervals along the vessel surfaces. For tau intensity, the mean intensity was  
258 calculated for each bin, and data within 3 microns from each vessel surface was used to

259 determine the surface tau percentile<sup>15</sup>. For neurons and tangles, their density was  
260 calculated by measuring the number of objects within 30 microns from the vessel surface  
261 and comparing their quantity to the spatial volume of each bin.

## 262 **Results**

### 263 **Three-dimensional histology reveals the accumulation of tau protein along blood** 264 **vessels**

265 Tissue was collected from the inferior temporal gyrus, a region associated with functional  
266 impairment and tau accumulation in AD<sup>16</sup>. Each block was sliced into 0.5-1 mm thick  
267 sections, then cleared and immunolabeled following an optimized protocol described  
268 previously<sup>11</sup>. AD and control human brain tissue samples immunolabeled for phospho-  
269 tau (AT8, recognizes tau phosphorylated at both S202 and T205), blood vessels (Glut1),  
270 neurons (HuD), and cell nuclei (DAPI, **Fig. 1A-B**)<sup>17-20</sup>.

271 Visual inspection of vasculature reveals significant phospho-tau staining along the  
272 surface of some blood vessels (**Fig. 1C-E**). This phospho-tau staining is distinct from  
273 neurofibrillary tangles and shows a diffuse pattern that appears regionally along the length  
274 of select blood vessels in each sample. Control samples (Braak 0-I) did not have  
275 neurofibrillary tangles or phospho-tau + staining along blood vessels (**Fig. 1B, F**). In  
276 segments with vascular tau staining, staining also appears to extend away from the blood  
277 vessel surface and diminish as distance increases from the surface (**Fig. 1C, D**).  
278 Additionally, select blood vessels showed the accumulation of NFTs in addition to the  
279 diffuse staining on their surface (**Fig. 1E**). These observations suggest a spatial  
280 relationship between vasculature and phosphorylated tau accumulation in AD that is  
281 distinct from the accumulation of NFTs.

### 282 **Characteristics and cortical location of blood vessels with tau accumulation**

283 To better define vascular tau, we established a protocol for isolating, quantifying, and  
284 classifying regions of tau accumulation on blood vessels. The virtual reality (VR) image  
285 analysis software Syglass was used to manually segment individual blood vessels from  
286 each sample by tracing masks along the surface of each blood vessel (**Fig 2A**). We found  
287 that VR tracing allowed us to more efficiently and accurately segment individual vessels

288 compared to segmentation on 2D planes. Individual vessel masks were then realigned to  
289 the original image coordinates for the quantification of staining in other channels. In total,  
290 we segmented 18-25 blood vessels from n=6 AD and n=6 control donor brains. We also  
291 subdivided each image into its respective layers and found that the average tau intensity  
292 on the blood vessel surface—defined as the region within 3 microns of the vessel mask—  
293 was distributed across all cortical layers except for layer 6. This distribution pattern is  
294 distinct from the amount of tangles and neurons present in each cortical region (**Fig. 2 B,**  
295 **C**). Vascular tau was not observed along microvessels (<10 $\mu$ m in diameter), and the  
296 average diameter of measured vessels was 17  $\mu$ m  $\pm$  4 (std. dev.). Vessels of similar size  
297 were selected for comparison in control tissues (**Fig. 2D**). Last, nearly all vessels with tau  
298 accumulation appeared to be arterioles, as indicated by co-labeling with smooth muscle  
299 actin (SMA, a marker of smooth muscle cells; **Fig. 2F**).

### 300 **Frequency of vascular tau accumulation in inferior temporal gyrus**

301 Next, we measured the intensity of tau labeling along the vascular surface. Each  
302 measured vessel had a segmented length that was continuous for roughly 300-2000  
303 microns (**Fig. 3A**). Control samples consistently lacked tau accumulation along any blood  
304 vessels. There was also substantial diversity in the pattern of tau along blood vessels,  
305 both within and across AD samples. To simplify comparisons of tau accumulation across  
306 samples, we subdivided each 10-micron interval along a vessel surface into segments  
307 and assigned each segment a percentile based on the average phospho-tau staining  
308 intensity within that segment (**Fig 3B**). Regions of tau accumulation included stretches  
309 spanning small vascular lengths of <50 microns to >1000 microns and could appear  
310 continuous or patchy (**Fig. 3C-H**).

311 We hypothesized that one potential explanation for these observations could be that  
312 vessels occasionally travel through regions of high tau pathology. To rule out that the  
313 appearance of tau is incidental, we compared differences between groups of vascular  
314 segments within each percentile bin. Segments with the most vascular tau (top 90-100  
315 percentiles) show substantial increase in tau intensity that decreases with distance from  
316 the vessel surface (**Fig. 4**). This indicates that tau is enriched near blood vessels  
317 compared to the surrounding tissue. By comparison, segments in the next decile (80-90<sup>th</sup>

318 percentile) show no substantial change in tau intensity with distance from the vessel  
319 surface, indicating no enrichment. Segments with less surface tau (80<sup>th</sup> percentile and  
320 below) show the opposite trend—a decrease in tau intensity near the vessel surface (**Fig.**  
321 **4**). Together, these data strongly support a relationship tau present near the vessel  
322 surface is distinct from that in the surrounding tissue.

### 323 **Composition of tau in blood vessels**

324 Pathological tau is heavily post-translationally modified, so we additionally sought to  
325 understand what forms of tau are present in this vascular compartment by physically  
326 isolating blood vessels from the ITG of our AD and control samples and conducting WES  
327 assays (**Fig. 5A**). The assays revealed a significant increase total tau, the tau N-terminus  
328 (Tau13), and phospho-T181 and -T217 tau in the blood vessels of AD donors compared  
329 to controls (**Fig. 5B, C, E, G**). However, the levels of other forms of tau, S202, P231, and  
330 the tau C-terminus (Tau46), were not found in significantly higher levels in AD samples  
331 compared with controls (**Fig. 5D, F, H**). This indicates that enrichment of tau in  
332 vasculature is not an artifact of the AT8 antibody and that certain forms of tau are  
333 increased in this compartment in AD.

### 334 **Relationship between vascular tau and NFT burden**

335 Given the enrichment in vasculature for tau species known to contribute to the formation  
336 of NFTs, and an observation that tangles in AD tissues were frequently adjacent to tau-  
337 positive vessels (**Fig. 6A-D**), we next wanted to understand if areas of increased vascular  
338 tau were related to the local NFT burden. To do this, we segmented individual NFTs and  
339 neurons in our images (**Fig. 6E-G**). We then calculated the percent of neurons containing  
340 NFTs near blood vessels to determine the relationship between the amount of vascular  
341 surface tau and the likelihood of nearby neurons being NFT-positive. This quantification  
342 took place in the tissue immediately adjacent to the blood vessel--defined as a volume  
343 within 30 microns of the vessel surface. An ANOVA, correcting for repeated measures,  
344 shows a significant difference in the percent of neurons with NFTs that varies with  
345 vascular surface tau percentile (P value = 0.037, R<sup>2</sup>= 0.47; **Fig. 6H**). This indicates that  
346 as vascular surface tau increases, so too does the amount of nearby neurons with NFTs.

347 **Discussion**

348 Tau accumulation and NFT formation are closely associated with the clinical progression  
349 of Alzheimer's disease<sup>1</sup>. Here, we report that the accumulation of tau along blood vessels  
350 is apparent in three-dimensional histology. These experiments indicate that pathological  
351 tau exhibits a close spatial relationship to vasculature in human Alzheimer's disease  
352 brain. This provides evidence of an interaction between tau pathology and blood vessels,  
353 perhaps similar to CAA. Such an interaction reinforces previous studies conducted in  
354 mouse models of tau pathology which found changes in cerebral microvessels<sup>10, 21, 22</sup>.  
355 These results also provide further evidence for the existence of a vascular clearance  
356 pathway for tau pathology, which may be disrupted in regions with increased levels of tau  
357 accumulation.

358 Recent studies have investigated the role of vasculature in tau clearance at larger,  
359 systemic scales in mouse models of AD, finding that brain vasculature and the associated  
360 glymphatic system regulate clearance of tau pathology<sup>6, 7, 23</sup>. These conclusions have  
361 been supported in human magnetic resonance imaging, where perivascular spaces were  
362 found to be associated with tau pathophysiology in early AD<sup>24</sup>. Our study investigated  
363 the association of tau and vasculature at smaller, single-cell spatial scales in human AD  
364 donors to determine if patterns of tau accumulation are consistent with the observations  
365 of these previous studies. Indeed, large-volume images we obtained of the inferior  
366 temporal gyrus indicate that tau accumulates along vascular segments in AD, suggesting  
367 that the clearance of tau pathology by vasculature may be dysfunctional in this area.  
368 Specifically, we found that some blood vessels exhibit regions with higher levels of tau  
369 near the blood vessel surface than the surrounding tissue--indicating that tau-positivity is  
370 not simply occurring by chance. Additionally, in areas with low levels of vascular tau, tau  
371 intensity is lower near the vessel surface compared to its surroundings, suggesting  
372 functional vascular clearance. Altogether this supports the idea that vessels are important  
373 for tau clearance.

374 Overall, the deposition of tau on blood vessels is similar to CAA. Tau-positive vessels are  
375 primarily arterioles. However, leptomeningeal vessels were not observed to be sites of  
376 tau deposition, with areas of tau-positive vessels being distributed throughout cortical

377 layers I-V. By comparison, CAA type 2-affected vessels are frequently found in the  
378 leptomeninges and arterioles in superficial cortical layers<sup>25, 26</sup>. Tau-positivity also did not  
379 appear to overlap with dyschoric capillary changes, though cases with CAA type 1 were  
380 not included in this study<sup>27</sup>. Prior studies have reported that neuritic dystrophies are  
381 increased near vessels that accumulate CAA<sup>28, 29</sup>. While we did observe dystrophic  
382 neurites around some blood vessels, neither these nor the additional diffuse staining  
383 along the length of vessels appeared to be directly related to CAA. However, we cannot  
384 rule out that some tau-positive vessels may also be affected by CAA at other locations  
385 along their length. Other CAA-related features that we did not observe in tau positive  
386 segments included vessels with a “double-barrel” appearance or the presence of  
387 microhemorrhages, though direct examination of CAA-positive tissues would help to  
388 confirm these observations.

389 Furthermore, we performed protein assays that found blood vessels in AD patients  
390 contain higher levels of phospho-tau species within the blood vessel walls themselves  
391 compared to controls. In particular, we observed increased phospho-T217. Phospho-  
392 T217 tau is also a sensitive blood-based biomarker for AD and a form of phosphorylated  
393 tau that has been found to accumulate in AD and drive the hyperphosphorylation and  
394 fibrillization of wild-type tau<sup>30, 31</sup>. This suggests that blood vessels harbor aggregate-prone  
395 species of tau, which was further supported by analysis showing an association between  
396 vascular tau and local NFT density. These data are in line previous reports that observed  
397 a greater incidence of tau labeling near vessels with increasing Braak stage and our own  
398 prior work showing that isolated blood vessels from AD brain are enriched for tau species  
399 capable of seeding new aggregates<sup>10, 32</sup>. Together, these observations suggest that  
400 impaired vascular clearance of tau may contribute to the progression of AD pathology.

401 In addition to the experimental results of our study, we also present a new methodology  
402 for characterizing disease pathology relative to anatomical structures. Until recently, it  
403 has not been possible to image large tissue volumes with cellular and sub-cellular  
404 resolution, but new imaging methods, such as confocal and light sheet fluorescence  
405 microscopes, coupled with tissue clearing technology have now enabled this. However,  
406 many of the current, most widely used quantification tools face challenges analyzing



407 these images, as they were primarily designed for traditional, two-dimensional analysis<sup>33</sup>,  
408 <sup>34</sup>. This study presents a method utilizing emerging machine learning and virtual reality  
409 tracing software to identify objects throughout large images, while accounting for  
410 differential staining and object characteristics throughout the image volume, a challenge  
411 that traditional simple thresholding and rolling-ball filtering methods do not account for.  
412 This is a significant development, because it allows for the alignment of pathology, brain  
413 structures, and original imagery to investigate spatial relationships across large regions,  
414 while maintaining cellular or subcellular resolution.

415 While these data indicated that tau is enriched at points along blood vessels compared  
416 to the surrounding tissue, additional characterization of tau-enriched vessels is needed  
417 to better understand the cause and consequence of this buildup on blood vessels. For  
418 example, studies have implicated aquaporin 4 (AQP4) in the clearance of tau pathology;  
419 thus, AQP4 provides a possible target for studies looking to determine the precise cause  
420 of vascular tau<sup>35</sup>. If specific transporters or tau-interacting proteins can be identified, they  
421 may provide a new target for therapeutics designed to remove tau pathology. Further,  
422 while nearly all vessels examined in AD inferior temporal gyrus exhibited regions of  
423 enhanced tau accumulation, whether these findings can be extended to other brain areas,  
424 including those where NFTs are relatively scant such as the visual cortex and cerebellum,  
425 could widen our understanding of this phenotype.

426 In summary, this study provides new evidence of brain vasculature's role in the  
427 progression of AD and distribution of pathology. Perhaps most notably, our results  
428 indicate that tau deposits around vasculature with characteristics similar to amyloid beta  
429 in CAA. Additionally, this work provides further support for the role of vasculature in  
430 mediating tau clearance. Further investigation of how this disrupts vascular functions  
431 including specific transporter mechanisms in endothelial cells, may help uncover new  
432 methods to modify tau burden in the brain via vascular clearance.

### 433 **Funding and Acknowledgements**

434 This work was supported by a grant from the Alzheimer's Association (23AARG-1029355;  
435 REB), by the NIH NIA R00AG068602 (TJZ) and R00AG061259 (REB), the Harrison  
436 Gardner Jr Innovation Award (BTH, TJZ), the Jack Satter Foundation (BTH, REB, TJZ),



437 and a Predoctoral Fellowship FPU18/00630 from the Spanish Ministry of Science,  
438 Innovation, and Universities (ES). We additionally thank the donors and their families who  
439 have contributed to the Massachusetts Alzheimer's Disease Research Center, which is  
440 supported by the NIH NIA P30AG062421. We would also like to thank the Harvard Center  
441 for Biological Imaging including Douglas Richardson for the use of their imaging facility  
442 and helpful conversations.

#### 443 **Competing Interests**

444 BTH has a family member who works at Novartis and owns stock in Novartis; he serves  
445 on the SAB of Dewpoint and owns stock. He serves on a scientific advisory board or is  
446 a consultant for AbbVie, Avrobio, Axon, Biogen, BMS Cell Signaling, Genentech, Ionis,  
447 Novartis, Seer, Takeda, the US Dept of Justice, Vigil, Voyager. His laboratory is  
448 supported by Sponsored research agreements with AbbVie, F Prime, and research grants  
449 from the Cure Alzheimer's Fund, Tau Consortium, and the JPB Foundation. REB works  
450 on the AbbVie-Hyman Collaboration. The other authors declare no competing interests.

451 **Figures**

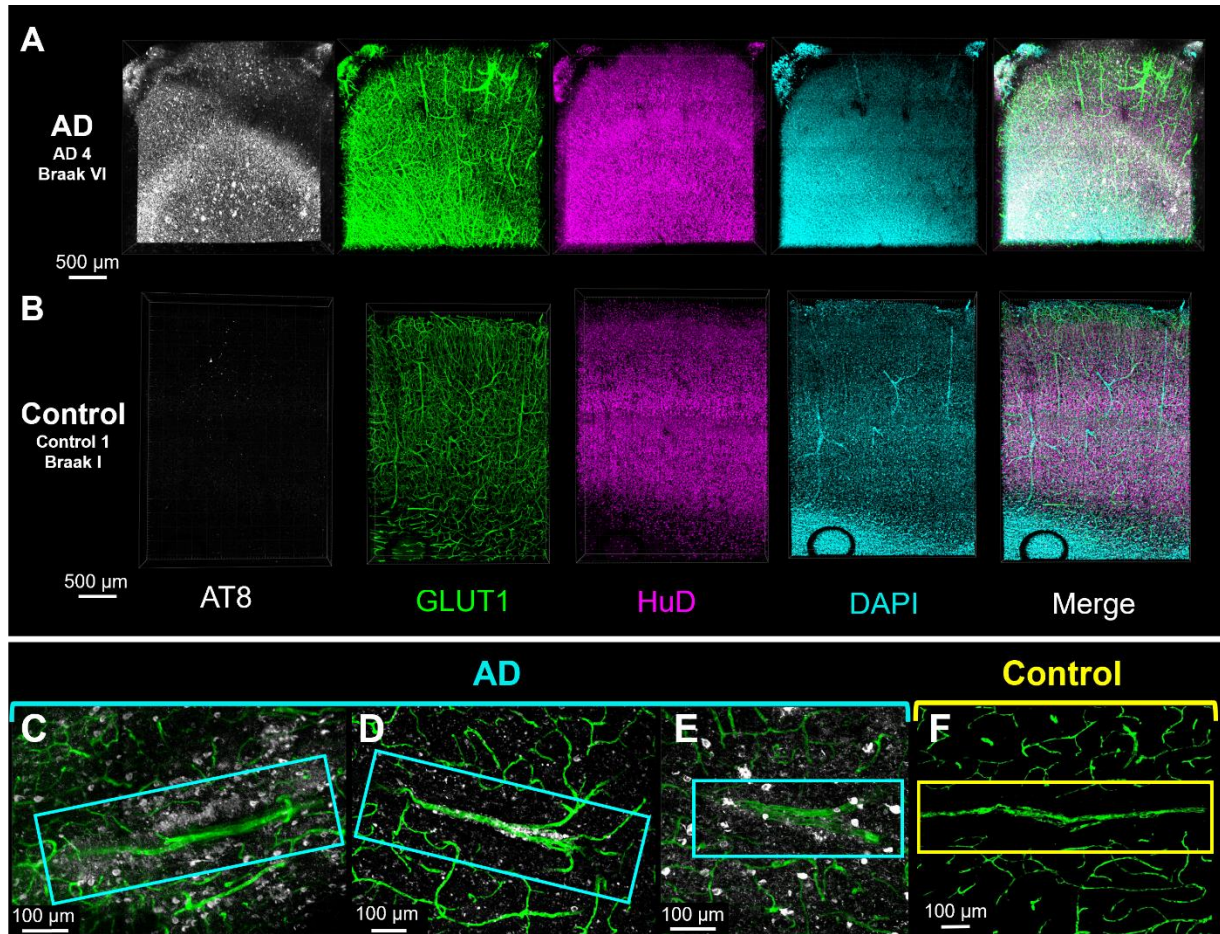

452

453 **Figure 1 Three-dimensional histology reveals the presence of vascular-associated**  
454 **tau.** Confocal fluorescence microscopy images showing raw data from the inferior  
455 temporal gyrus of an AD (A) and a control (B) donor. Images are immunolabeled for  
456 vasculature (GLUT1, green), neurons (HuD, magenta), nuclei (DAPI, blue), and AT8 tau  
457 (white). (C-E) Vascular tau accumulation in blood vessels AD donors compared with a (F)  
458 control donor. Images show staining for vasculature (green) and AT8 tau (white) in a 40  
459  $\mu$ m thick z-slice.

460

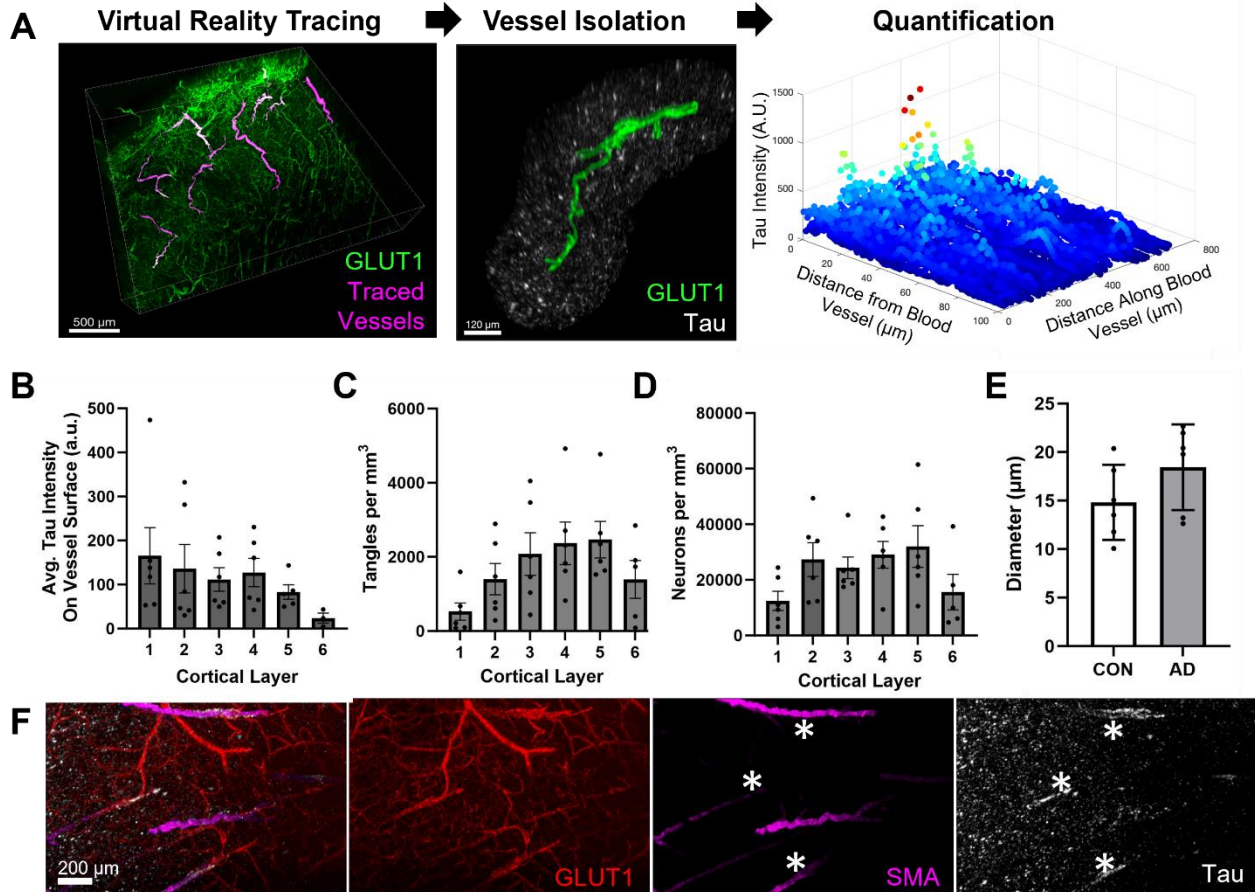

461

462 **Figure 2 Examination of tau along individual blood vessels throughout the cortex.**

463 **(A)** An overall schema of the method used to quantify vascular tau. Blood vessels are first  
 464 traced in virtual reality (magenta) and are shown overlying the original GLUT1-positive  
 465 blood vessel imaging data (green). Tracing allows for the isolation of individual blood  
 466 vessels and their surround, including tau pathology (white)  $\leq 100 \mu\text{m}$  from the blood  
 467 vessel surface (example is from AD 5 vessel 5). Subsequently, quantification of tau  
 468 intensity along and away from the blood vessel surface was conducted. **(B)** Measures of  
 469 the average tau intensity at the vessel surface (within 3 microns) per donor and cortical  
 470 layer. **(C)** The average AT8-positive tangle density and **(D)** HuD-positive neuron density  
 471 per cubic mm was also measured for each cortical layer. **(E)** The average diameter of  
 472 vessels measured per donor. Dots represent individuals, bars represent means  $\pm$  SEM.  
 473 **(F)** Separate tissue was labeled with antibodies to GLUT1, SMA, and tau show areas of  
 474 tau accumulation on blood vessels that are also SMA-positive (indicated by asterisks).

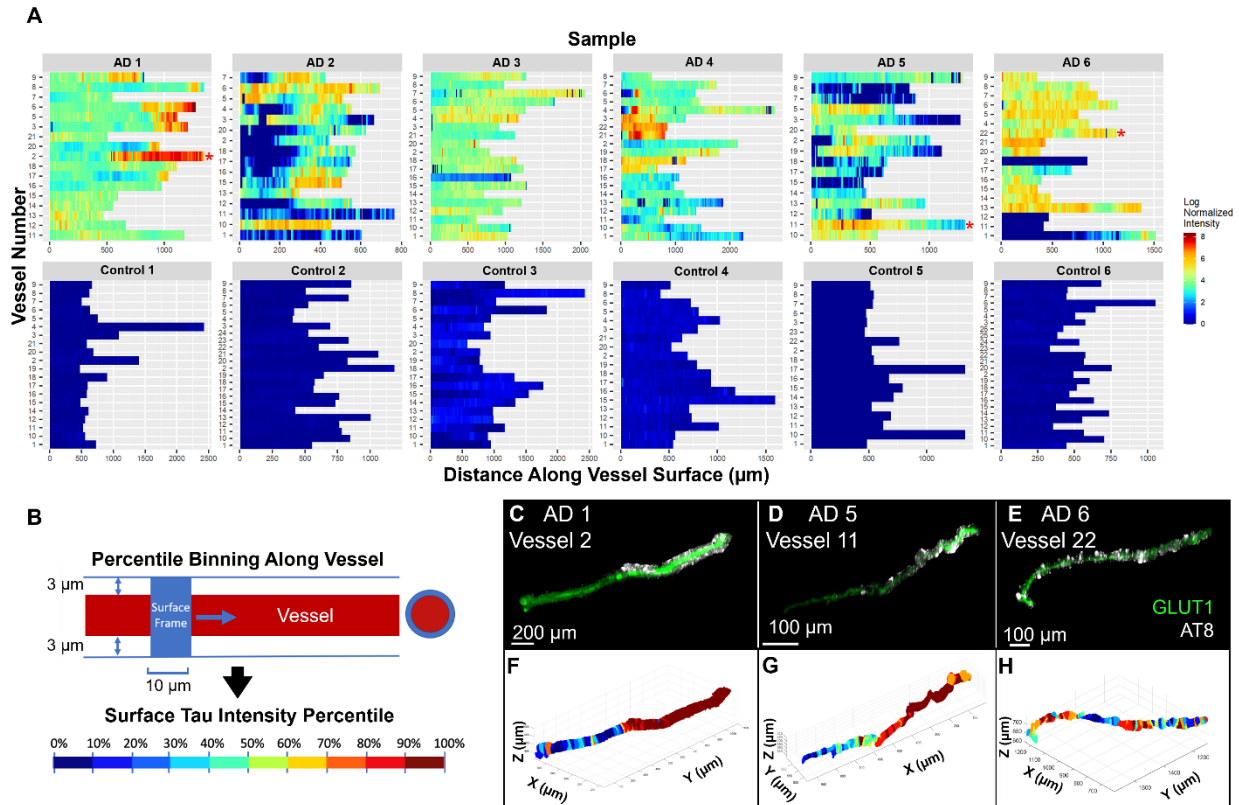

**Figure 3. Mapping tau accumulation on blood vessels. (A)** Heatmaps showing log normalized tau intensity within 3 microns from the surface of each segmented blood vessel ( $n=107$  AD,  $n=127$  control). Rows are individual vessels and columns are tau intensity measures along the vessel length. **(B)** Data is binned every 10 microns along the blood vessel's surface and shows the mean intensity of each bin, normalized to the mean tau intensity of the whole image. Red asterisks highlight example vessels shown in panels C-H. **(B)** A schematic showing how data binning and surface tau measures were acquired. Each bin was then percentile ranked by AT8 tau staining intensity. **(C, D, E)** Example of isolated blood vessel (green) and tau labeling (white). **(F, G, H)** Corresponding maps of tau intensity along the vessel surface. Color corresponds to percentiles (deciles).



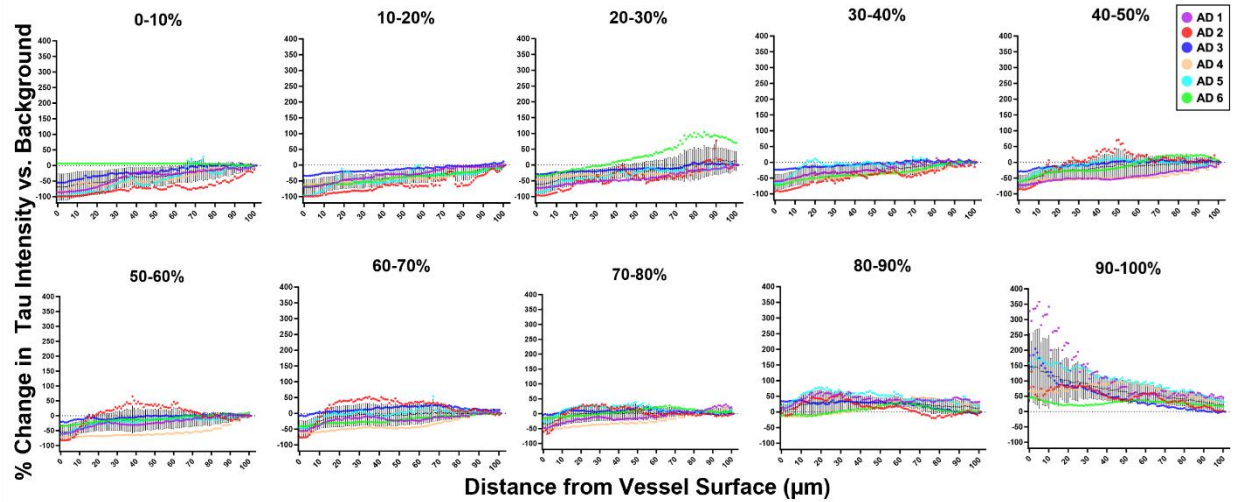

488

489 **Figure 4. Tau intensity is related to distance from the blood vessel surface.** Blood  
490 vessel segments were grouped according to surface tau intensity by percentiles (deciles)  
491 and the amount of tau immunolabeling is plotted by distance from blood vessel surface.  
492 Values for each donor (colored lines) are normalized to the average tau value in the whole  
493 image (background) such that a 0% change (grey dashed line) means the tau labeling  
494 intensity is no different than the average level of tau in the whole image.

495

496

497

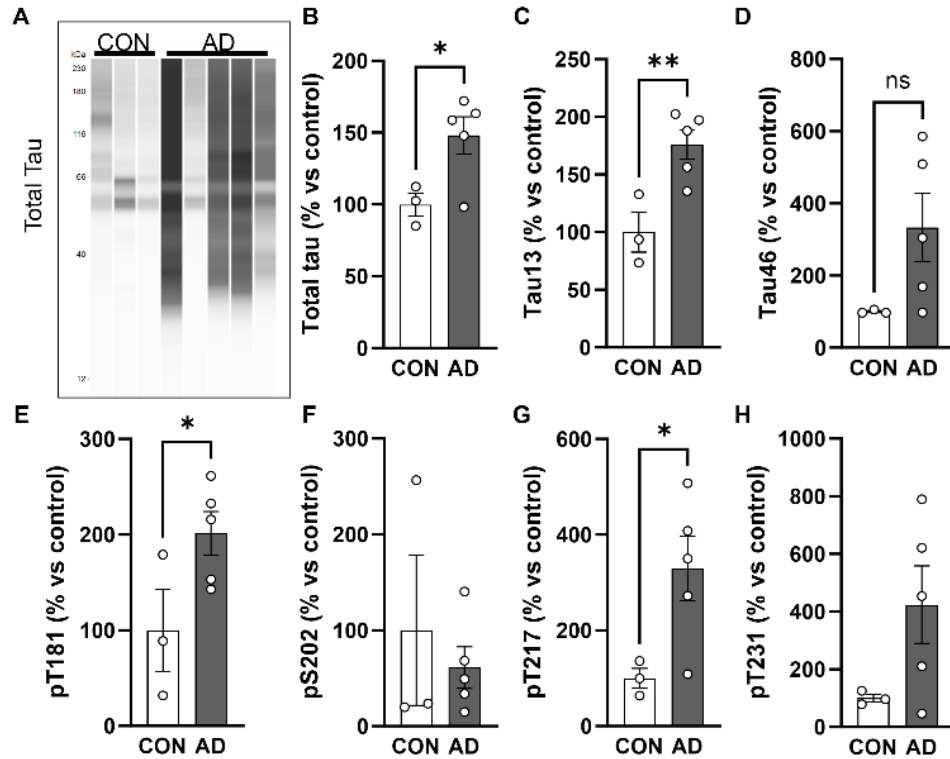

498 **Figure 5. Post-translationally modified tau is enriched in AD blood vessels. (A)**  
499 Isolation of blood vessels from the inf. temp. gyrus of n=3 control and n=5 AD brains  
500 shows that tau is enriched in vasculature and can be visualized with multiple antibodies  
501 including total tau = DAKO rabbit polyclonal. Quantification of total signal per lane for (B)  
502 total tau, (C) Tau13 n-terminal antibody, (D) Tau46 c-terminal antibody, (E) phospho-  
503 T181 tau, (F) phospho-S202 tau, (G) phospho-T217 tau and (H) phospho-T231 tau. All  
504 values normalized to the average of controls. One-tailed t-test \*p<0.05, \*\*p<0.01. Error  
505 bars = means +/- SEM.

506

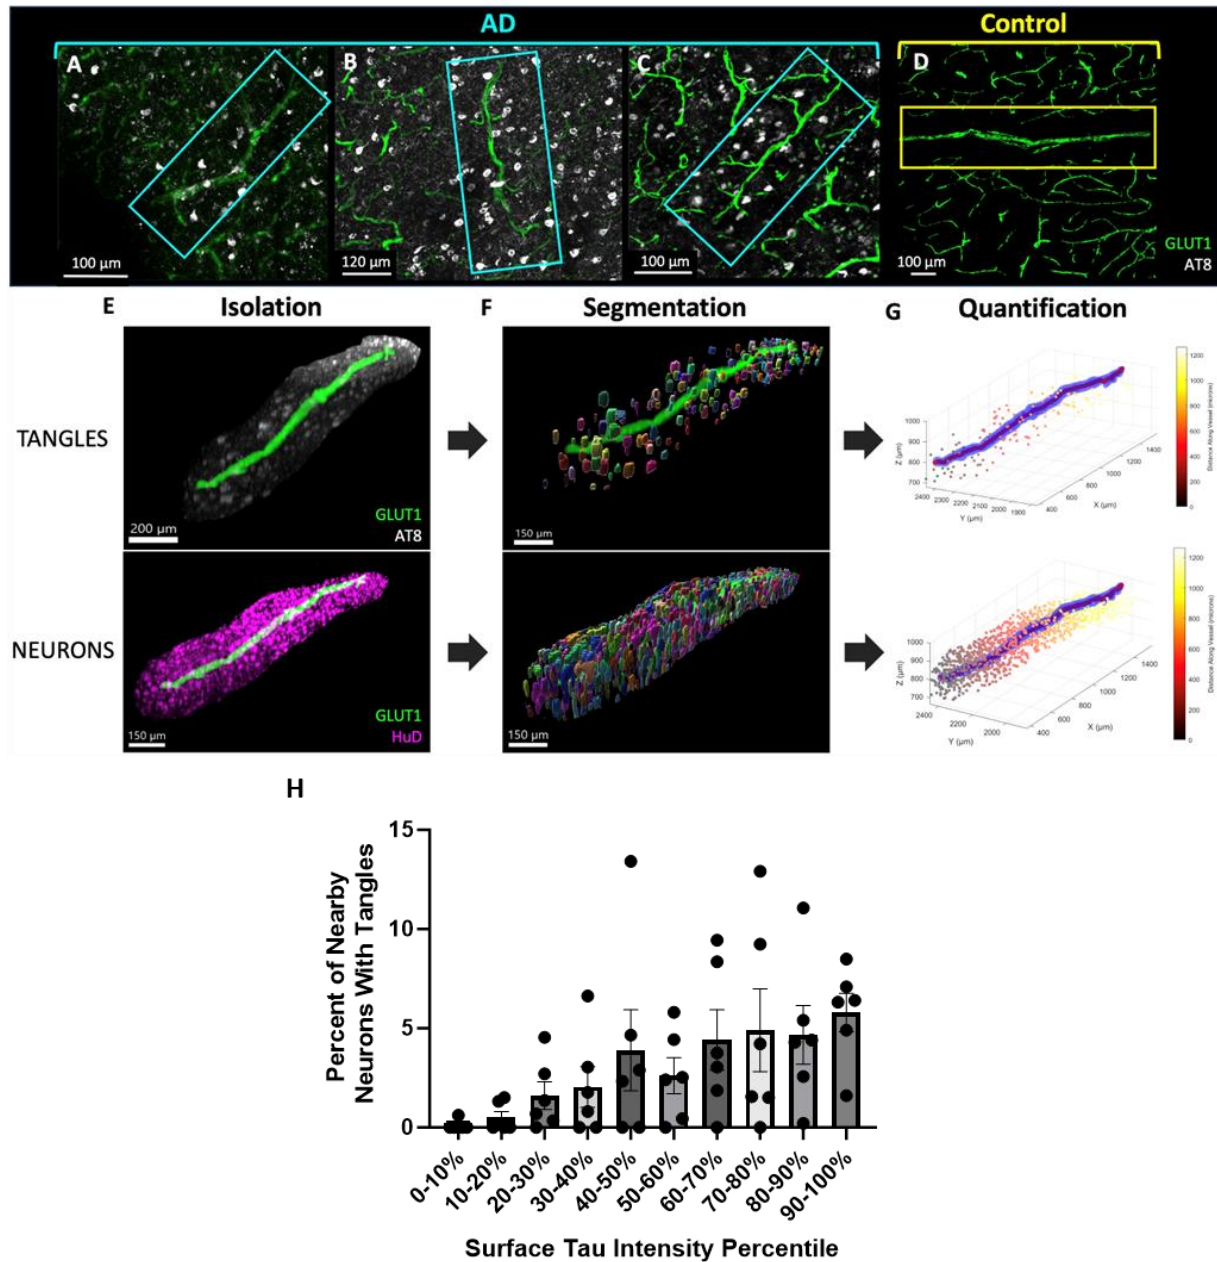

507

508 **Figure 6. NFT and neuron density analysis.** Examples of blood vessels showing NFT  
509 accumulation near the blood vessel surface in samples (A) AD 2, (B) AD 1, (C) AD6, and  
510 (D) control 3. (E) Isolated blood vessel with surrounding tau pathology (AT8, white) and  
511 surrounding neurons (HuD, magenta). (F) NFTs and neurons were identified and  
512 segmented using Ilastik. Visualization of segmentation masks were generated using  
513 Imaris and with a value of 1  $\mu\text{m}$  to smooth the surfaces. (G) A custom MATLAB script was  
514 developed to calculate the distance of each segmented tangle and neuron from the



515 surface of each blood vessel. Plots show the blood vessel (blue), its calculated centerline  
516 for object distance calculations (red), and objects colored according to their distance  
517 along the blood vessel. (H) Plot shows the percent of neurons with NFT in regions near  
518 (0-30 microns) blood vessels with varying amounts of surface tau. Repeated measures  
519 ANOVA P value = 0.037,  $R^2 = 0.47$ . Dots represent individuals, bars represent means +/-  
520 SEM.

| Sample Number | Sex | Braak Stage | Age at Death | Comorbidities      | PMI |
|---------------|-----|-------------|--------------|--------------------|-----|
| AD 1          | M   | V           | 74           | CVD                | 10  |
| AD 2          | M   | VI          | 75           | CVD                | 4   |
| AD 3          | M   | III         | ≥90          | CVD                | 14  |
| AD 4          | F   | VI          | 66           | CVD                | 14  |
| AD 5          | F   | VI          | ≥90          | Arteriolosclerosis | 5   |
| AD 6          | F   | VI          | 70           | CVD                | 24  |
| AD 7          | M   | V           | 52           | LBD, CAA, CVD      | 28  |
| Control 1     | F   | I           | 68           | CVD                | 20  |
| Control 2     | M   | 0           | 62           | CVD                | 17  |
| Control 3     | M   | 0           | 73           | CVD                | 14  |
| Control 4     | M   | 0           | 63           | CVD                | 18  |
| Control 5     | F   | I           | 64           | CVD                | 18  |
| Control 6     | F   | 0           | 56           | Acute Hypoxia      | 8   |

521

522 **Table 1: Human tissues used in this study.** Details include sex (M = male; F = female),  
523 age at death, Braak stage, comorbidities (CVD = cerebrovascular disease; LBD = Lewy  
524 Body Dementia; CAA = Cerebral Amyloid Angiopathy), and post-mortem interval (PMI;  
525 hours). None of the inferior temporal gyrus areas examined contained overt vascular  
526 lesions. Sample AD 7 was used for SMA labeling (Fig. 2F) while the others were used for  
527 quantitative assessments.

528

529

530

531

532

533

534

535  
536  
537  
538  
539  
540  
541  
542  
543  
544  
545  
546  
547  
548  
549  
550  
551  
552  
553  
554  
555  
556  
557  
558  
559  
560  
561  
562  
563  
564  
565  
566  
567  
568  
569  
570  
571  
572  
573  
574  
575  
576  
577  
578  
579  
580  
581  
582  
583  
584  
585

## BIBLIOGRAPHY

1. Arriagada PV, Growdon JH, Hedley-Whyte ET, Hyman BT. Neurofibrillary tangles but not senile plaques parallel duration and severity of Alzheimer's disease. *Neurology*. 1992;42(3 Pt 1):631-9. doi: 10.1212/wnl.42.3.631. PubMed PMID: 1549228.
2. Bierer LM, Hof PR, Purohit DP, Carlin L, Schmeidler J, Davis KL, Perl DP. Neocortical neurofibrillary tangles correlate with dementia severity in Alzheimer's disease. *Arch Neurol*. 1995;52(1):81-8. doi: 10.1001/archneur.1995.00540250089017. PubMed PMID: 7826280.
3. Lewis DA, Campbell MJ, Terry RD, Morrison JH. Laminar and regional distributions of neurofibrillary tangles and neuritic plaques in Alzheimer's disease: a quantitative study of visual and auditory cortices. *J Neurosci*. 1987;7(6):1799-808. doi: 10.1523/JNEUROSCI.07-06-01799.1987. PubMed PMID: 2439665; PMCID: PMC6568896.
4. Arnold SE, Hyman BT, Flory J, Damasio AR, Van Hoesen GW. The topographical and neuroanatomical distribution of neurofibrillary tangles and neuritic plaques in the cerebral cortex of patients with Alzheimer's disease. *Cereb Cortex*. 1991;1(1):103-16. doi: 10.1093/cercor/1.1.103. PubMed PMID: 1822725.
5. Tarasoff-Conway JM, Carare RO, Osorio RS, Glodzik L, Butler T, Fieremans E, Axel L, Rusinek H, Nicholson C, Zlokovic BV, Frangione B, Blennow K, Menard J, Zetterberg H, Wisniewski T, de Leon MJ. Clearance systems in the brain-implications for Alzheimer disease. *Nat Rev Neurol*. 2015;11(8):457-70. Epub 20150721. doi: 10.1038/nrneurol.2015.119. PubMed PMID: 26195256; PMCID: PMC4694579.
6. Harrison IF, Ismail O, Machhada A, Colgan N, Ohene Y, Nahavandi P, Ahmed Z, Fisher A, Meftah S, Murray TK, Ottersen OP, Nagelhus EA, O'Neill MJ, Wells JA, Lythgoe MF. Impaired glymphatic function and clearance of tau in an Alzheimer's disease model. *Brain*. 2020;143(8):2576-93. doi: 10.1093/brain/awaa179. PubMed PMID: 32705145; PMCID: PMC7447521.
7. Iliff JJ, Chen MJ, Plog BA, Zeppenfeld DM, Soltero M, Yang L, Singh I, Deane R, Nedergaard M. Impairment of glymphatic pathway function promotes tau pathology after traumatic brain injury. *J Neurosci*. 2014;34(49):16180-93. doi: 10.1523/JNEUROSCI.3020-14.2014. PubMed PMID: 25471560; PMCID: PMC4252540.
8. Iliff JJ, Wang M, Liao Y, Plogg BA, Peng W, Gundersen GA, Benveniste H, Vates GE, Deane R, Goldman SA, Nagelhus EA, Nedergaard M. A paravascular pathway facilitates CSF flow through the brain parenchyma and the clearance of interstitial solutes, including amyloid beta. *Sci Transl Med*. 2012;4(147):147ra11. doi: 10.1126/scitranslmed.3003748. PubMed PMID: 22896675; PMCID: PMC3551275.
9. van Veluw SJ, Hou SS, Calvo-Rodriguez M, Arbel-Ornath M, Snyder AC, Frosch MP, Greenberg SM, Bacskai BJ. Vasomotion as a Driving Force for Paravascular Clearance in the Awake Mouse Brain. *Neuron*. 2020;105(3):549-61 e5. Epub 20191203. doi: 10.1016/j.neuron.2019.10.033. PubMed PMID: 31810839; PMCID: PMC7028316.
10. Bennett RE, Hu M, Fernandes A, Perez-Rando M, Robbins A, Kamath T, Dujardin S, Hyman BT. Tau reduction in aged mice does not impact Microangiopathy. *Acta Neuropathol Commun*. 2020;8(1):137. Epub 20200818. doi: 10.1186/s40478-020-01014-4. PubMed PMID: 32811565; PMCID: PMC7436970.
11. Zwang TJ, Bennett RE, Lysandrou M, Woost B, Zhang A, Lieber CM, Richardson DS, Hyman BT. Tissue libraries enable rapid determination of conditions that preserve antibody labeling in cleared mouse and human tissue. *Elife*. 2023;12. Epub 20230119. doi: 10.7554/eLife.84112. PubMed PMID: 36656755; PMCID: PMC9889093.
12. Zwang TJ, Woost B, Bailey J, Høglund Z, Richardson DS, Bennett RE, Hyman BT. Spatial characterization of tangle-bearing neurons and ghost tangles in the human inferior temporal gyrus with three-dimensional imaging. *Brain Commun*. 2023;5(3):fcad130. Epub 20230419. doi: 10.1093/braincomms/fcad130. PubMed PMID: 37324243; PMCID: PMC10263274.

- 586 13. Berg S, Kutra D, Kroeger T, Straehle CN, Kausler BX, Haubold C, Schiegg M, Ales J,  
587 Beier T, Rudy M, Eren K, Cervantes JI, Xu B, Beuttenmueller F, Wolny A, Zhang C, Koethe U,  
588 Hamprecht FA, Kreshuk A. ilastik: interactive machine learning for (bio)image analysis. *Nat*  
589 *Methods*. 2019;16(12):1226-32. Epub 20190930. doi: 10.1038/s41592-019-0582-9. PubMed  
590 PMID: 31570887.
- 591 14. D'Errico J. arclength. MATLAB Central File Exchange.
- 592 15. Lal Shrestha D. Percentiles of a sample. MATLAB Central File Exchange2023.
- 593 16. Halawa OA, Gatchel JR, Amariglio RE, Rentz DM, Sperling RA, Johnson KA, Marshall  
594 GA, Alzheimer's Disease Neuroimaging I. Inferior and medial temporal tau and cortical amyloid  
595 are associated with daily functional impairment in Alzheimer's disease. *Alzheimers Res Ther*.  
596 2019;11(1):14. Epub 20190131. doi: 10.1186/s13195-019-0471-6. PubMed PMID: 30704519;  
597 PMCID: PMC6357436.
- 598 17. Goedert M, Jakes R, Vanmechelen E. Monoclonal antibody AT8 recognises tau protein  
599 phosphorylated at both serine 202 and threonine 205. *Neurosci Lett*. 1995;189(3):167-9. doi:  
600 10.1016/0304-3940(95)11484-e. PubMed PMID: 7624036.
- 601 18. Bronicki LM, Jasmin BJ. Emerging complexity of the HuD/ELAVI4 gene; implications for  
602 neuronal development, function, and dysfunction. *RNA*. 2013;19(8):1019-37. doi:  
603 10.1261/rna.039164.113. PubMed PMID: 23861535; PMCID: PMC3708524.
- 604 19. Kapuscinski J. DAPI: a DNA-specific fluorescent probe. *Biotech Histochem*.  
605 1995;70(5):220-33. doi: 10.3109/10520299509108199. PubMed PMID: 8580206.
- 606 20. Gerhart DZ, LeVasseur RJ, Broderius MA, Drewes LR. Glucose transporter localization in  
607 brain using light and electron immunocytochemistry. *J Neurosci Res*. 1989;22(4):464-72. doi:  
608 10.1002/jnr.490220413. PubMed PMID: 2668543.
- 609 21. Bennett RE, Robbins AB, Hu M, Cao X, Betensky RA, Clark T, Das S, Hyman BT. Tau  
610 induces blood vessel abnormalities and angiogenesis-related gene expression in P301L  
611 transgenic mice and human Alzheimer's disease. *Proc Natl Acad Sci U S A*. 2018;115(6):E1289-  
612 E98. Epub 20180122. doi: 10.1073/pnas.1710329115. PubMed PMID: 29358399; PMCID:  
613 PMC5819390.
- 614 22. Park L, Hochrainer K, Hattori Y, Ahn SJ, Anfray A, Wang G, Uekawa K, Seo J, Palfini V,  
615 Blanco I, Acosta D, Eliezer D, Zhou P, Anrather J, Iadecola C. Tau induces PSD95-neuronal NOS  
616 uncoupling and neurovascular dysfunction independent of neurodegeneration. *Nat Neurosci*.  
617 2020;23(9):1079-89. Epub 20200810. doi: 10.1038/s41593-020-0686-7. PubMed PMID:  
618 32778793; PMCID: PMC7896353.
- 619 23. Ishida K, Yamada K, Nishiyama R, Hashimoto T, Nishida I, Abe Y, Yasui M, Iwatsubo T.  
620 Glymphatic system clears extracellular tau and protects from tau aggregation and  
621 neurodegeneration. *J Exp Med*. 2022;219(3). Epub 20220225. doi: 10.1084/jem.20211275.  
622 PubMed PMID: 35212707; PMCID: PMC8932543.
- 623 24. Vilor-Tejedor N, Ciampa I, Operto G, Falcon C, Suarez-Calvet M, Crous-Bou M, Shekari  
624 M, Arenaza-Urquijo EM, Mila-Aloma M, Grau-Rivera O, Minguillon C, Kollmorgen G, Zetterberg  
625 H, Blennow K, Guigo R, Molinuevo JL, Gispert JD, study A. Perivascular spaces are associated  
626 with tau pathophysiology and synaptic dysfunction in early Alzheimer's continuum. *Alzheimers*  
627 *Res Ther*. 2021;13(1):135. Epub 20210805. doi: 10.1186/s13195-021-00878-5. PubMed PMID:  
628 34353353; PMCID: PMC8340485.
- 629 25. Thal DR, Ghebremedhin E, Rub U, Yamaguchi H, Del Tredici K, Braak H. Two types of  
630 sporadic cerebral amyloid angiopathy. *J Neuropathol Exp Neurol*. 2002;61(3):282-93. doi:  
631 10.1093/jnen/61.3.282. PubMed PMID: 11895043.
- 632 26. Vinters HV. Cerebral amyloid angiopathy. A critical review. *Stroke*. 1987;18(2):311-24.  
633 doi: 10.1161/01.str.18.2.311. PubMed PMID: 3551211.
- 634 27. Richard E, Carrano A, Hoozemans JJ, van Horssen J, van Haastert ES, Eurelings LS, de  
635 Vries HE, Thal DR, Eikelenboom P, van Gool WA, Rozemuller AJ. Characteristics of dyschoric

- 636 capillary cerebral amyloid angiopathy. *J Neuropathol Exp Neurol.* 2010;69(11):1158-67. doi:  
637 10.1097/NEN.0b013e3181fab558. PubMed PMID: 20940625.
- 638 28. Vidal R, Calero M, Piccardo P, Farlow MR, Unverzagt FW, Mendez E, Jimenez-Huete A,  
639 Beavis R, Gallo G, Gomez-Tortosa E, Ghiso J, Hyman BT, Frangione B, Ghetti B. Senile dementia  
640 associated with amyloid beta protein angiopathy and tau perivascular pathology but not neuritic  
641 plaques in patients homozygous for the APOE-epsilon4 allele. *Acta Neuropathol.* 2000;100(1):1-  
642 12. doi: 10.1007/s004010051186. PubMed PMID: 10912914.
- 643 29. Oshima K, Uchikado H, Dickson DW. Perivascular neuritic dystrophy associated with  
644 cerebral amyloid angiopathy in Alzheimer's disease. *Int J Clin Exp Pathol.* 2008;1(5):403-8. Epub  
645 20080101. PubMed PMID: 18787622; PMCID: PMC2480573.
- 646 30. Wang X, Liu Q, Li XG, Zhou QZ, Wu DQ, Li SH, Liu YC, Wang JZ. T217-Phosphorylation  
647 Exacerbates Tau Pathologies and Tau-Induced Cognitive Impairment. *J Alzheimers Dis.*  
648 2021;81(4):1403-18. doi: 10.3233/JAD-210297. PubMed PMID: 33935099.
- 649 31. Groot C, Cicognola C, Bali D, Triana-Baltzer G, Dage JL, Pontecorvo MJ, Kolb HC,  
650 Ossenkoppele R, Janelidze S, Hansson O. Diagnostic and prognostic performance to detect  
651 Alzheimer's disease and clinical progression of a novel assay for plasma p-tau217. *Alzheimers*  
652 *Res Ther.* 2022;14(1):67. Epub 20220514. doi: 10.1186/s13195-022-01005-8. PubMed PMID:  
653 35568889; PMCID: PMC9107269.
- 654 32. Merlini M, Wanner D, Nitsch RM. Tau pathology-dependent remodelling of cerebral  
655 arteries precedes Alzheimer's disease-related microvascular cerebral amyloid angiopathy. *Acta*  
656 *Neuropathol.* 2016;131(5):737-52. Epub 20160317. doi: 10.1007/s00401-016-1560-2. PubMed  
657 PMID: 26988843; PMCID: PMC4835519.
- 658 33. Bankhead P, Loughrey MB, Fernandez JA, Dombrowski Y, McArt DG, Dunne PD,  
659 McQuaid S, Gray RT, Murray LJ, Coleman HG, James JA, Salto-Tellez M, Hamilton PW. QuPath:  
660 Open source software for digital pathology image analysis. *Sci Rep.* 2017;7(1):16878. Epub  
661 20171204. doi: 10.1038/s41598-017-17204-5. PubMed PMID: 29203879; PMCID: PMC5715110.
- 662 34. Schindelin J, Arganda-Carreras I, Frise E, Kaynig V, Longair M, Pietzsch T, Preibisch S,  
663 Rueden C, Saalfeld S, Schmid B, Tinevez JY, White DJ, Hartenstein V, Eliceiri K, Tomancak P,  
664 Cardona A. Fiji: an open-source platform for biological-image analysis. *Nat Methods.*  
665 2012;9(7):676-82. Epub 20120628. doi: 10.1038/nmeth.2019. PubMed PMID: 22743772; PMCID:  
666 PMC3855844.
- 667 35. Gomolka RS, Hablitz LM, Mestre H, Giannetto M, Du T, Hauglund NL, Xie L, Peng W,  
668 Martinez PM, Nedergaard M, Mori Y. Loss of aquaporin-4 results in glymphatic system  
669 dysfunction via brain-wide interstitial fluid stagnation. *Elife.* 2023;12. Epub 20230209. doi:  
670 10.7554/eLife.82232. PubMed PMID: 36757363; PMCID: PMC9995113.
